# Supplementary material for: Gestational Phthalate Exposure and Preschool Attention Deficit Hyperactivity Disorder in Norway
Source: PubMed Central journal article supplement — Environ Epidemiol. 2021 Jul 1;5(4):e161. doi: 10.1097/EE9.0000000000000161 (PMC8367074; doi:10.1097/ee9.0000000000000161), 2021-07-01
Supplement: ee9-5-e161-s001.pdf [file ee9-5-e161-s001.pdf]

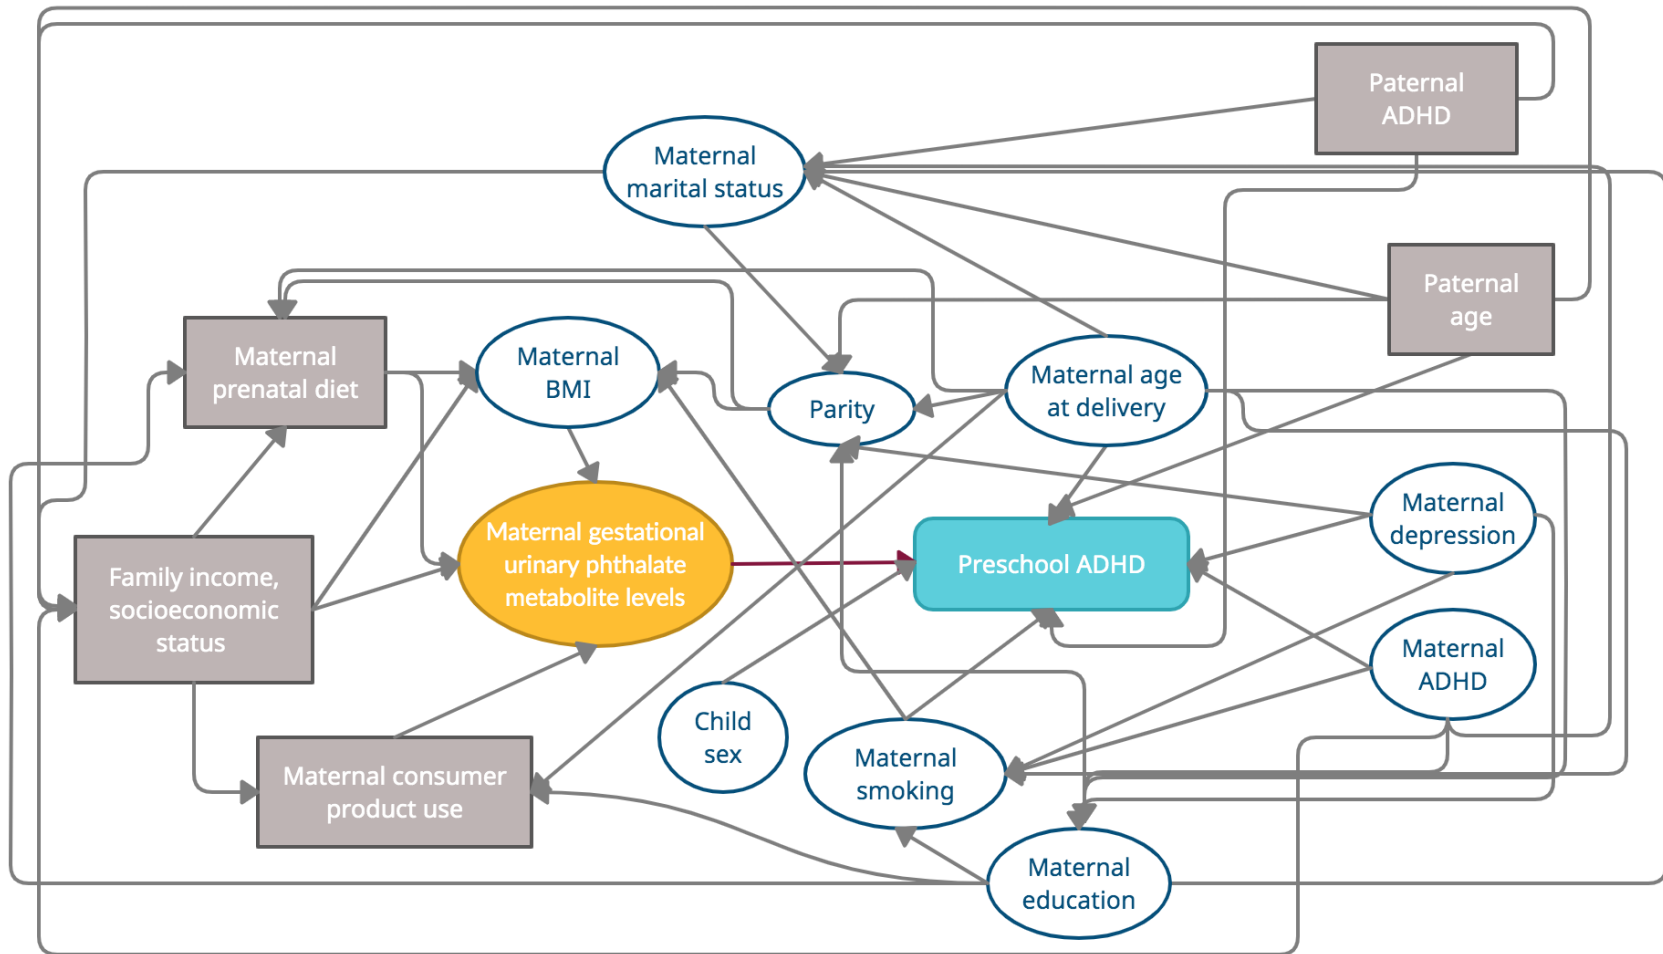

**Supplemental Digital Content 1.** Example of a directed acyclic graph used to identify potential confounders of the relationship between maternal gestational urinary phthalate metabolite levels (yellow oval) and preschool ADHD (blue rectangle). Unmeasured factors are shown in gray shaded rectangles, while measured factors are shown in blue un-shaded ovals.
