# Supplementary material for: Gestational Phthalate Exposure and Preschool Attention Deficit Hyperactivity Disorder in Norway
Source: PubMed Central journal article supplement — Environ Epidemiol. 2021 Jul 1;5(4):e161. doi: 10.1097/EE9.0000000000000161 (PMC8367074; doi:10.1097/ee9.0000000000000161), 2021-07-01
Supplement: ee9-5-e161-s002.pdf [file ee9-5-e161-s002.pdf]

|                  | Ln MEP       | Ln MiBP         | Ln MnBP         | Ln MBzP         | Ln $\Sigma$ DEHP | Ln $\Sigma$ DiNP |
|------------------|--------------|-----------------|-----------------|-----------------|------------------|------------------|
| Ln MEP           | 1<br>N = 807 | 0.15<br>N = 807 | 0.13<br>N = 806 | 0.08<br>N = 807 | 0.00<br>N = 807  | -0.11<br>N = 806 |
| Ln MiBP          |              | 1<br>N = 808    | 0.57<br>N = 807 | 0.48<br>N = 808 | 0.19<br>N = 808  | -0.04<br>N = 807 |
| Ln MnBP          |              |                 | 1<br>N = 807    | 0.61<br>N = 807 | 0.27<br>N = 807  | 0.02<br>N = 806  |
| Ln MBzP          |              |                 |                 | 1<br>N = 808    | 0.30<br>N = 808  | 0.01<br>N = 807  |
| Ln $\Sigma$ DEHP |              |                 |                 |                 | 1<br>N = 808     | 0.40<br>N = 807  |
| Ln $\Sigma$ DiNP |              |                 |                 |                 |                  | 1<br>N = 807     |

**Supplemental Digital Content 2.** Pearson correlation coefficients for natural log (ln)-transformed phthalate metabolite measures, adjusted for batch and specific gravity.
