# Supplementary material for: Gestational Phthalate Exposure and Preschool Attention Deficit Hyperactivity Disorder in Norway
Source: PubMed Central journal article supplement — Environ Epidemiol. 2021 Jul 1;5(4):e161. doi: 10.1097/EE9.0000000000000161 (PMC8367074; doi:10.1097/ee9.0000000000000161), 2021-07-01
Supplement: ee9-5-e161-s003.pdf [file ee9-5-e161-s003.pdf]

**Supplemental Digital Content 3.** Quintile of phthalate and odds of preschool ADHD: sensitivity analysis excluding cases and controls where mothers reported “other” education

| Phthalate          | Quintile                  | N cases <sup>c</sup> | adjusted for covariates <sup>a</sup> | adjusted for covariates and correlated phthalate metabolites <sup>b</sup> |
|--------------------|---------------------------|----------------------|--------------------------------------|---------------------------------------------------------------------------|
|                    |                           |                      | OR (95% CI)                          | OR (95% CI)                                                               |
| MEP                | 1. <26.0 µg/L             | 44                   | ref.                                 |                                                                           |
|                    | 2. 26.0 – 62.2 µg/L       | 44                   | 0.91 (0.54, 1.52)                    |                                                                           |
|                    | 3. 62.2 – 148 µg/L        | 56                   | 1.16 (0.71, 1.92)                    |                                                                           |
|                    | 4. 148 – 380 µg/L         | 54                   | 1.24 (0.75, 2.03)                    |                                                                           |
|                    | 5. >380 µg/L              | 52                   | 1.03 (0.62, 1.71)                    |                                                                           |
|                    | Linear model <sup>d</sup> | 250                  | 1.03 (0.92, 1.14)                    |                                                                           |
| MiBP <sup>e</sup>  | 1. <8.76 µg/L             | 31                   | ref.                                 | ref.                                                                      |
|                    | 2. 8.76 – 13.2 µg/L       | 41                   | 1.40 (0.80, 2.45)                    | 1.61 (0.86, 2.99)                                                         |
|                    | 3. 13.2 – 20.8 µg/L       | 64                   | 1.85 (1.09, 3.14)                    | 2.11 (1.13, 3.95)                                                         |
|                    | 4. 20.8 – 38.9 µg/L       | 74                   | 2.38 (1.40, 4.05)                    | 2.70 (1.41, 5.16)                                                         |
|                    | 5. >38.9 µg/L             | 40                   | 1.20 (0.68, 2.12)                    | 1.26 (0.63, 2.53)                                                         |
|                    | Linear model <sup>d</sup> | 250                  | 1.07 (0.89, 1.29)                    | 0.97 (0.77, 1.23)                                                         |
| MnBP               | 1. <9.90 µg/L             | 48                   | ref.                                 | ref.                                                                      |
|                    | 2. 9.90 – 14.6 µg/L       | 40                   | 0.74 (0.44, 1.25)                    | 0.51 (0.28, 0.93)                                                         |
|                    | 3. 14.6 – 21.9 µg/L       | 47                   | 0.90 (0.54, 1.49)                    | 0.51 (0.27, 0.96)                                                         |
|                    | 4. 21.9 – 34.0 µg/L       | 55                   | 1.11 (0.67, 1.82)                    | 0.56 (0.29, 1.10)                                                         |
|                    | 5. >34.0 µg/L             | 60                   | 1.14 (0.69, 1.87)                    | 0.59 (0.29, 1.20)                                                         |
|                    | Linear model <sup>d</sup> | 250                  | 1.19 (0.96, 1.46)                    | 1.12 (0.83, 1.50)                                                         |
| MBzP               | 1. <2.19 µg/L             | 38                   | ref.                                 | ref.                                                                      |
|                    | 2. 2.19 – 3.46 µg/L       | 40                   | 0.97 (0.57, 1.68)                    | 1.01 (0.55, 1.85)                                                         |
|                    | 3. 3.46 – 5.51 µg/L       | 52                   | 1.32 (0.78, 2.22)                    | 1.38 (0.76, 2.51)                                                         |
|                    | 4. 5.51 – 9.60 µg/L       | 54                   | 1.51 (0.90, 2.55)                    | 1.63 (0.85, 3.12)                                                         |
|                    | 5. >9.60 µg/L             | 66                   | 1.48 (0.89, 2.49)                    | 1.57 (0.80, 3.08)                                                         |
|                    | Linear model <sup>d</sup> | 250                  | 1.16 (0.97, 1.39)                    | 1.11 (0.88, 1.40)                                                         |
| ΣDEHP              | 1. <0.16 µmol/L           | 39                   | ref.                                 | ref.                                                                      |
|                    | 2. 0.16 – 0.21 µmol/L     | 52                   | 1.29 (0.77, 2.15)                    | 1.32 (0.78, 2.24)                                                         |
|                    | 3. 0.21 – 0.27 µmol/L     | 48                   | 1.25 (0.73, 2.12)                    | 1.19 (0.69, 2.06)                                                         |
|                    | 4. 0.27 – 0.38 µmol/L     | 47                   | 1.28 (0.76, 2.17)                    | 1.27 (0.74, 2.17)                                                         |
|                    | 5. >0.38 µmol/L           | 64                   | 1.68 (1.01, 2.78)                    | 1.63 (0.95, 2.79)                                                         |
|                    | Linear model <sup>d</sup> | 250                  | 1.26 (1.01, 1.56)                    | 1.22 (0.96, 1.55)                                                         |
| ΣDiNP <sup>e</sup> | 1. <0.012 µmol/L          | 42                   | ref.                                 | ref.                                                                      |
|                    | 2. 0.012 – 0.016 µmol/L   | 75                   | 2.05 (1.25, 3.36)                    | 2.02 (1.23, 3.31)                                                         |
|                    | 3. 0.016 – 0.020 µmol/L   | 35                   | 0.91 (0.52, 1.58)                    | 0.87 (0.50, 1.52)                                                         |
|                    | 4. 0.020 – 0.027 µmol/L   | 41                   | 1.10 (0.65, 1.88)                    | 1.03 (0.60, 1.76)                                                         |
|                    | 5. >0.027 µmol/L          | 57                   | 1.67 (1.01, 2.79)                    | 1.49 (0.88, 2.53)                                                         |
|                    | Linear model <sup>d</sup> | 250                  | 1.18 (0.93, 1.49)                    | 1.08 (0.84, 1.39)                                                         |

<sup>a</sup>Adjusted for specific gravity, analytic batch, child sex and maternal age, education, parity, depression during pregnancy, and ADHD-like symptoms.

<sup>b</sup>Adjusted for specific gravity, analytic batch, child sex and maternal age, education, parity, depression during pregnancy, ADHD-like symptoms and additionally adjusted for correlated metabolites (a) MiBP, MnBP, and MBzP co-adjusted for one another; (b) ΣDEHP and ΣDiNP co-adjusted for each other).

<sup>c</sup>Number with no missing exposure or covariates

<sup>d</sup>Per 1 natural log-unit increase in biomarker

<sup>e</sup>Associated nonlinearly (Wald test p<0.10) for MiBP and ΣDiNP when modeled using Model 2 adjustment set and restricted cubic splines with knots at 20<sup>th</sup>, 40<sup>th</sup>, 60<sup>th</sup>, and 80<sup>th</sup> percentiles.
