# Supplementary material for: Gestational Phthalate Exposure and Preschool Attention Deficit Hyperactivity Disorder in Norway
Source: PubMed Central journal article supplement — Environ Epidemiol. 2021 Jul 1;5(4):e161. doi: 10.1097/EE9.0000000000000161 (PMC8367074; doi:10.1097/ee9.0000000000000161), 2021-07-01
Supplement: ee9-5-e161-s004.pdf [file ee9-5-e161-s004.pdf]

**Supplemental Digital Content 4.** Phthalate metabolite concentration and odds of preschool ADHD by child sex, using partially and fully augmented product term models

| Adjusted for covariates <sup>a</sup> |                    |       |                                  |                                   |                |                                  |                                   |                |  |
|--------------------------------------|--------------------|-------|----------------------------------|-----------------------------------|----------------|----------------------------------|-----------------------------------|----------------|--|
| Phthalat<br>e                        | Cases <sup>d</sup> |       | Partially augmented <sup>b</sup> |                                   |                | Fully augmented <sup>c</sup>     |                                   |                |  |
|                                      | boys               | girls | Boys<br>OR <sup>e</sup> (95% CI) | Girls<br>OR <sup>e</sup> (95% CI) | p <sup>f</sup> | Boys<br>OR <sup>e</sup> (95% CI) | Girls<br>OR <sup>e</sup> (95% CI) | p <sup>f</sup> |  |
| MEP                                  | 142                | 111   | 1.03 (0.89, 1.19)                | 1.03 (0.88, 1.21)                 | 0.97           | 1.03 (0.89, 1.19)                | 1.03 (0.88, 1.21)                 | 0.99           |  |
| MiBP                                 | 142                | 111   | 1.17 (0.92, 1.50)                | 0.97 (0.73, 1.29)                 | 0.33           | 1.16 (0.91, 1.49)                | 0.98 (0.73, 1.30)                 | 0.36           |  |
| MnBP                                 | 142                | 111   | 1.42 (1.07, 1.88)                | 0.93 (0.68, 1.28)                 | 0.05           | 1.41 (1.06, 1.87)                | 0.94 (0.68, 1.30)                 | 0.07           |  |
| MBzP                                 | 142                | 111   | 1.20 (0.95, 1.53)                | 1.06 (0.82, 1.37)                 | 0.47           | 1.19 (0.94, 1.52)                | 1.06 (0.82, 1.38)                 | 0.53           |  |
| ΣDEHP                                | 142                | 111   | 1.32 (1.00, 1.74)                | 1.10 (0.78, 1.55)                 | 0.42           | 1.31 (0.99, 1.74)                | 1.10 (0.78, 1.55)                 | 0.44           |  |
| ΣDiNP                                | 142                | 111   | 1.22 (0.88, 1.68)                | 1.17 (0.83, 1.64)                 | 0.86           | 1.22 (0.89, 1.69)                | 1.16 (0.83, 1.62)                 | 0.81           |  |

  

| Adjusted for covariates and correlated phthalates <sup>g</sup> |                    |       |                                  |                                   |                |                                  |                                   |                |  |
|----------------------------------------------------------------|--------------------|-------|----------------------------------|-----------------------------------|----------------|----------------------------------|-----------------------------------|----------------|--|
| Phthalat<br>e                                                  | Cases <sup>d</sup> |       | Partially augmented <sup>b</sup> |                                   |                | Fully augmented <sup>c</sup>     |                                   |                |  |
|                                                                | boys               | girls | Boys<br>OR <sup>e</sup> (95% CI) | Girls<br>OR <sup>e</sup> (95% CI) | p <sup>f</sup> | Boys<br>OR <sup>e</sup> (95% CI) | Girls<br>OR <sup>e</sup> (95% CI) | p <sup>f</sup> |  |
| MEP                                                            | 142                | 111   |                                  |                                   |                |                                  |                                   |                |  |
| MiBP                                                           | 142                | 111   | 0.98 (0.71, 1.35)                | 1.00 (0.71, 1.41)                 | 0.93           | 0.98 (0.71, 1.35)                | 1.00 (0.71, 1.41)                 | 0.94           |  |
| MnBP                                                           | 142                | 111   | 1.43 (0.97, 2.10)                | 0.82 (0.51, 1.31)                 | 0.07           | 1.42 (0.97, 2.09)                | 0.83 (0.52, 1.33)                 | 0.09           |  |
| MBzP                                                           | 142                | 111   | 1.01 (0.74, 1.39)                | 1.17 (0.84, 1.65)                 | 0.53           | 1.00 (0.73, 1.38)                | 1.17 (0.83, 1.64)                 | 0.52           |  |
| ΣDEHP                                                          | 142                | 111   | 1.28 (0.95, 1.73)                | 1.03 (0.70, 1.51)                 | 0.37           | 1.27 (0.94, 1.72)                | 1.03 (0.70, 1.52)                 | 0.41           |  |
| ΣDiNP                                                          | 142                | 111   | 1.10 (0.78, 1.55)                | 1.15 (0.79, 1.69)                 | 0.85           | 1.11 (0.78, 1.57)                | 1.14 (0.78, 1.67)                 | 0.91           |  |

<sup>a</sup>Adjusted for specific gravity, analytic batch, child sex and maternal age, education, parity, depression during pregnancy, and maternal ADHD-like symptoms.

<sup>b</sup>sex-interaction products for phthalate and for maternal education

<sup>c</sup>sex-interaction product terms for phthalate and all covariates

<sup>d</sup>Number with no missing exposure or covariates

<sup>e</sup>Per 1 natural log-unit increase in biomarker

<sup>f</sup>p for sex\*phthalate interaction in linear regression model

<sup>g</sup>Adjusted for specific gravity, analytic batch, child sex and maternal age, education, parity, depression during pregnancy, maternal ADHD-like symptoms, and additionally adjusted for correlated metabolites (a) MiBP, MnBP, and MBzP co-adjusted for one another; b) ΣDEHP and ΣDiNP co-adjusted for each other).
